# Supplementary material for: A promising ‘single’ and ‘dual’ drug-nanocomposite enriched contact lens for the management of glaucoma in response to the tear fluid enzyme
Source: Royal Society of Chemistry journal article supplement (doi:10.1039/d3tb02624h), 2024-01-01
Supplement: d3tb02624h1.pdf [file d3tb02624h1.pdf]

Supporting Information

**A Promising ‘Single’ and ‘Dual’ Drug-Nanocomposite Enriched Contact Lens for the Management of Glaucoma in Response to Tear Fluid Enzyme**

*B.N. Kumara* <sup>[a]</sup>, *K. Velmurugan* <sup>[b]</sup>, *M. Vivek Ghate* <sup>[c]</sup>, *R. Shambhu* <sup>[d]</sup>, *Jayabalan Nirmal\** <sup>[b]</sup>, *K. Sudhakara Prasad\** <sup>[a]</sup> <sup>[e]</sup>

<sup>[a]</sup> Nanomaterial Research Laboratory [NMRL], Smart Materials And Devices, Yenepoya Research Centre, Yenepoya [Deemed to be University], Deralakatte, Mangalore 575 018, India.

<sup>[b]</sup> Translational Pharmaceutics Research Laboratory (TPRL), Department of Pharmacy, Birla Institute of Technology and Sciences (BITS), Pilani, Hyderabad Campus, Hyderabad, 500 078, Telangana, India

<sup>[c]</sup> Yenepoya Technology Incubator, Yenepoya [Deemed to be University], Deralakatte, Mangalore 575 018, India.

<sup>[d]</sup> Department of Ophthalmology, Yenepoya Medical College, Yenepoya [Deemed to be University], Deralakatte, Mangalore, 575 018, India

<sup>[e]</sup> Centre for Nutrition Studies, Yenepoya [Deemed to be University], Deralakatte, Mangalore 575 018, India

Tel: +91-824 220 4668-2035; Fax: +91-824 220 4667

\*Email: [ksprasadnair@yenepoya.edu.in](mailto:ksprasadnair@yenepoya.edu.in) & [nirmalji@hyderabad.bits-pilani.ac.in](mailto:nirmalji@hyderabad.bits-pilani.ac.in)

**Table. S1. Light transparency of fabricated CLs at various spectrum ranges.**

| Contact Lenses | Light Transmittance (%) |            |            |
|----------------|-------------------------|------------|------------|
|                | SWB                     | LWB        | Visible    |
|                | 381-460 nm              | 461-500 nm | 381-700 nm |
| Blank CL       | 93.71                   | 94.31      | 95.65      |
| pGQD-CL        | 90.45                   | 91.05      | 91.26      |
| CS-CL          | 57.11                   | 58.91      | 67.40      |
| LP-CL          | 81.82                   | 84.51      | 87.06      |
| LP-TM-CL       | 83.91                   | 86.28      | 88.21      |

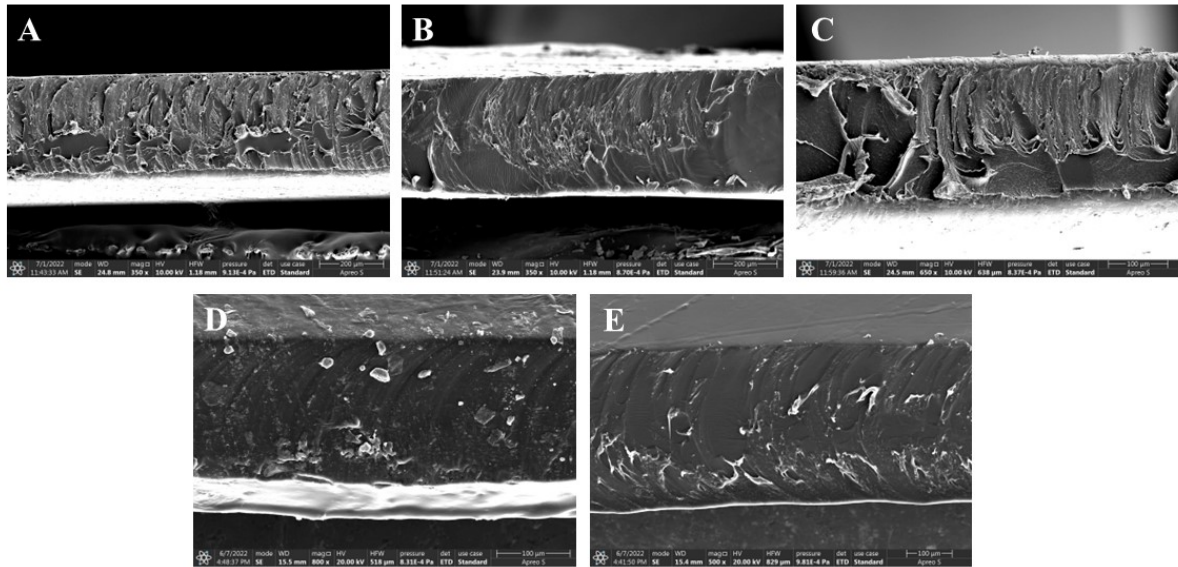

24

25

26 **Fig.S1. Cross-sectional view FE-SEM images of A. Blank CL, B. pGQD-CL, C. CS-CL,**

27 **D. LP-CL, and E. LP-TM-CL.**

28

29

30

31

32

33

34

35

36

37

38

39

40

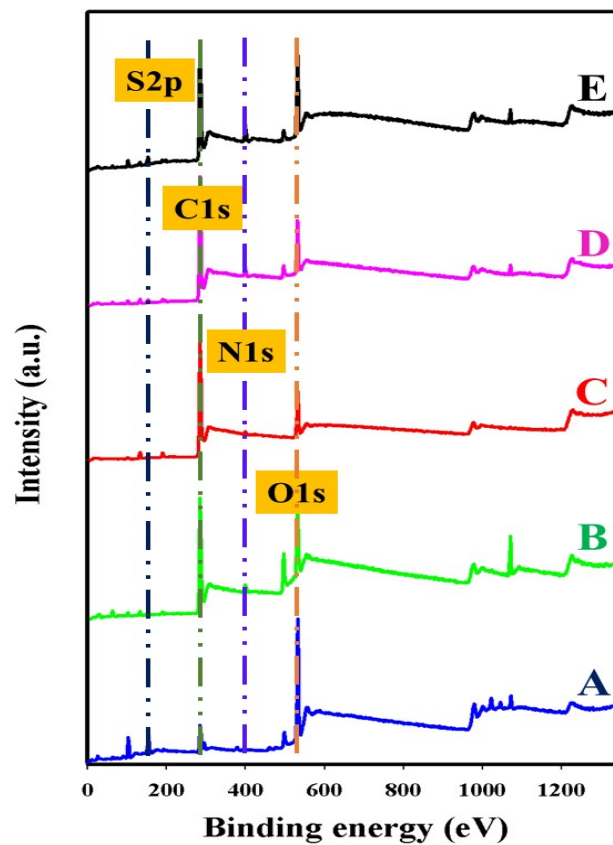

41 **Fig.S2. XPS survey scan spectral analysis of fabricated contact lens A. Blank CL, B.**

42 **pGQD-CL, C. CS-CL, D. LP-CL, and E. LP-TM-CL.**

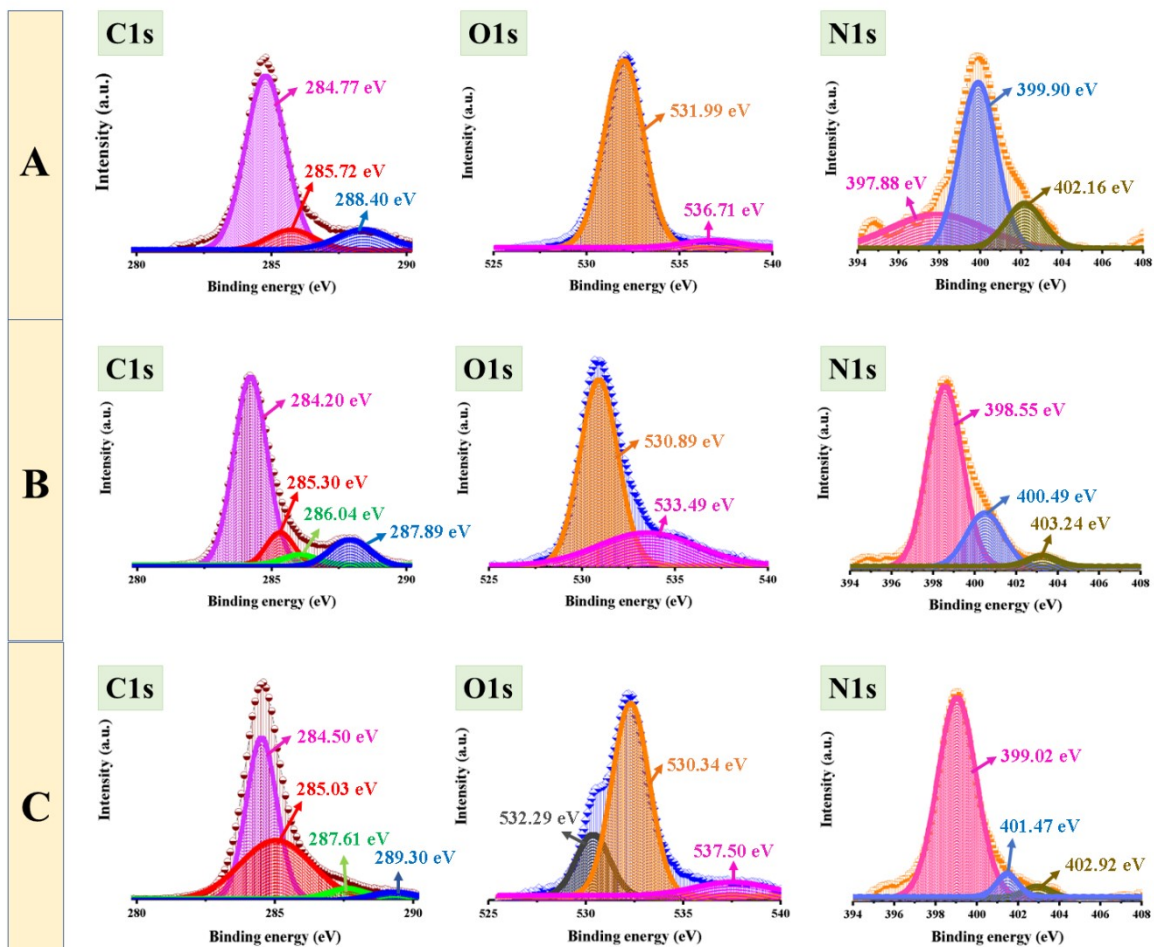

43

44 **Fig.S3. XPS high-resolution deconvoluted spectrum of A. Blank CL, B. pGQD-CL, and**  
 45 **C. CS-CL.**

46

47

48

49

50

51

52

53

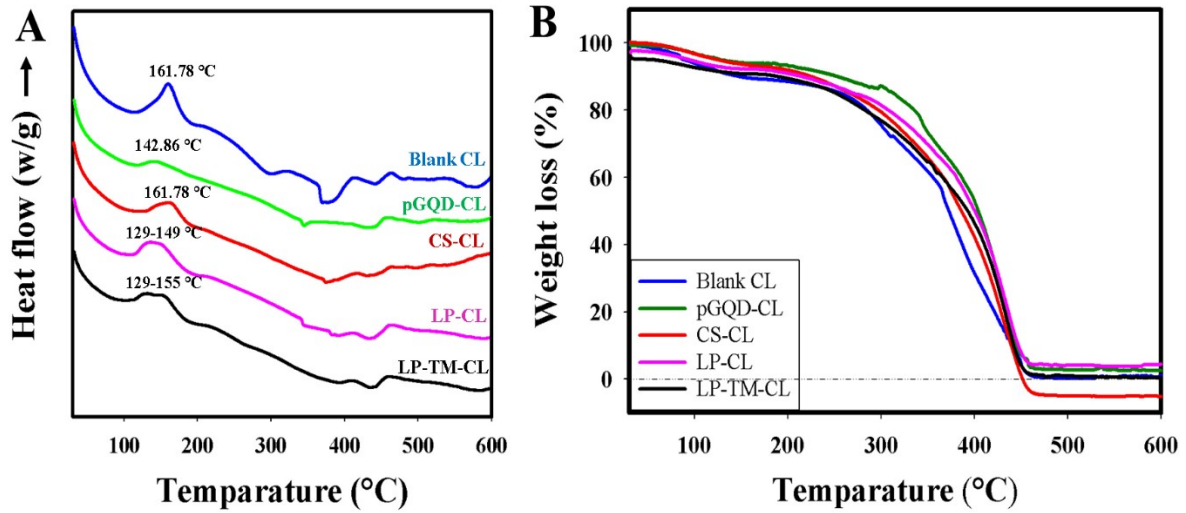

54

55 **Fig.S4. Represents A. Differential scanning calorimetry and B. Thermogravimetric**  
 56 **analysis of fabricated CLs.**

57

58

59

60

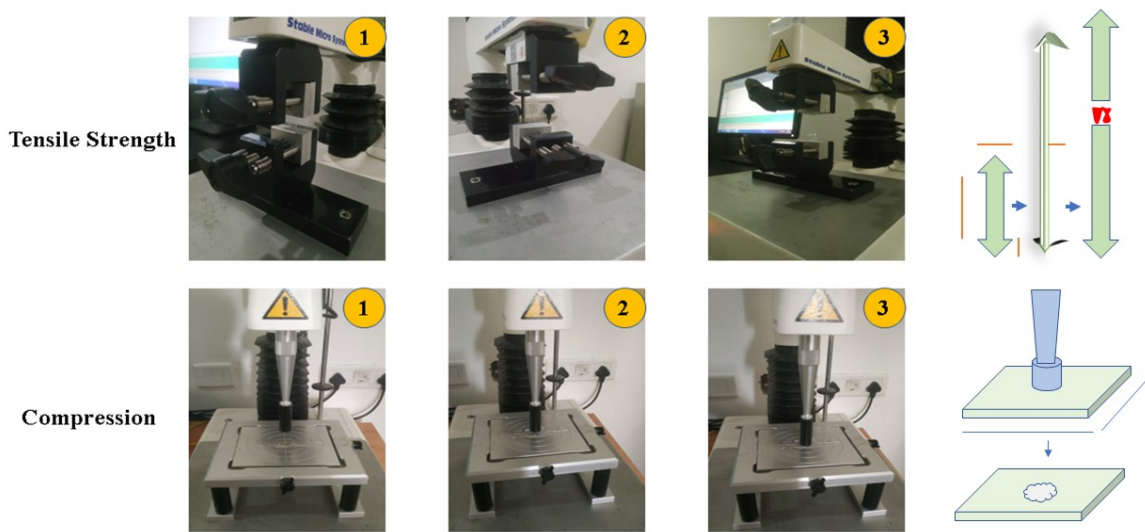

61

62 **Fig.S5. Analysis of Tensile strength and compressions studies of the fabricated CLs by**  
 63 **using a Universal testing machine (UTM).**

64

65

66

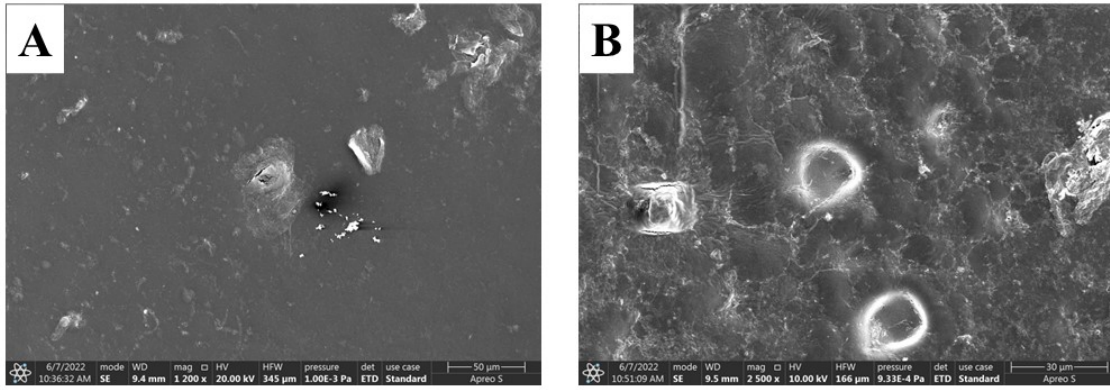

67

68 **Fig.S6. A & B. Represents the Field Emission-Scanning Electron Microscopic (FE-SEM)**  
 69 **image of interaction of lysozyme towards blank CL (Magnifications at 50 and 30 μm).**

70

71

72

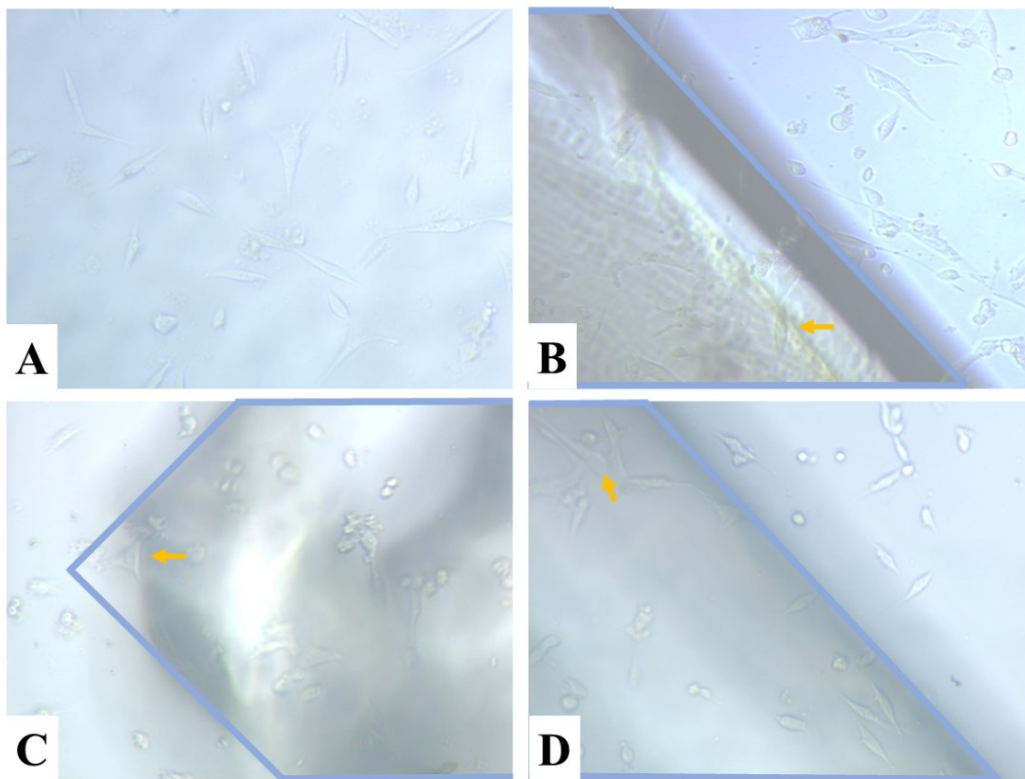

73

74 **Fig.S7. *In vitro* bright field imaging studies of A. Control, B. Blank CL, C. LP-CL, and D.**  
 75 **LP-TM-CL.**

76

77



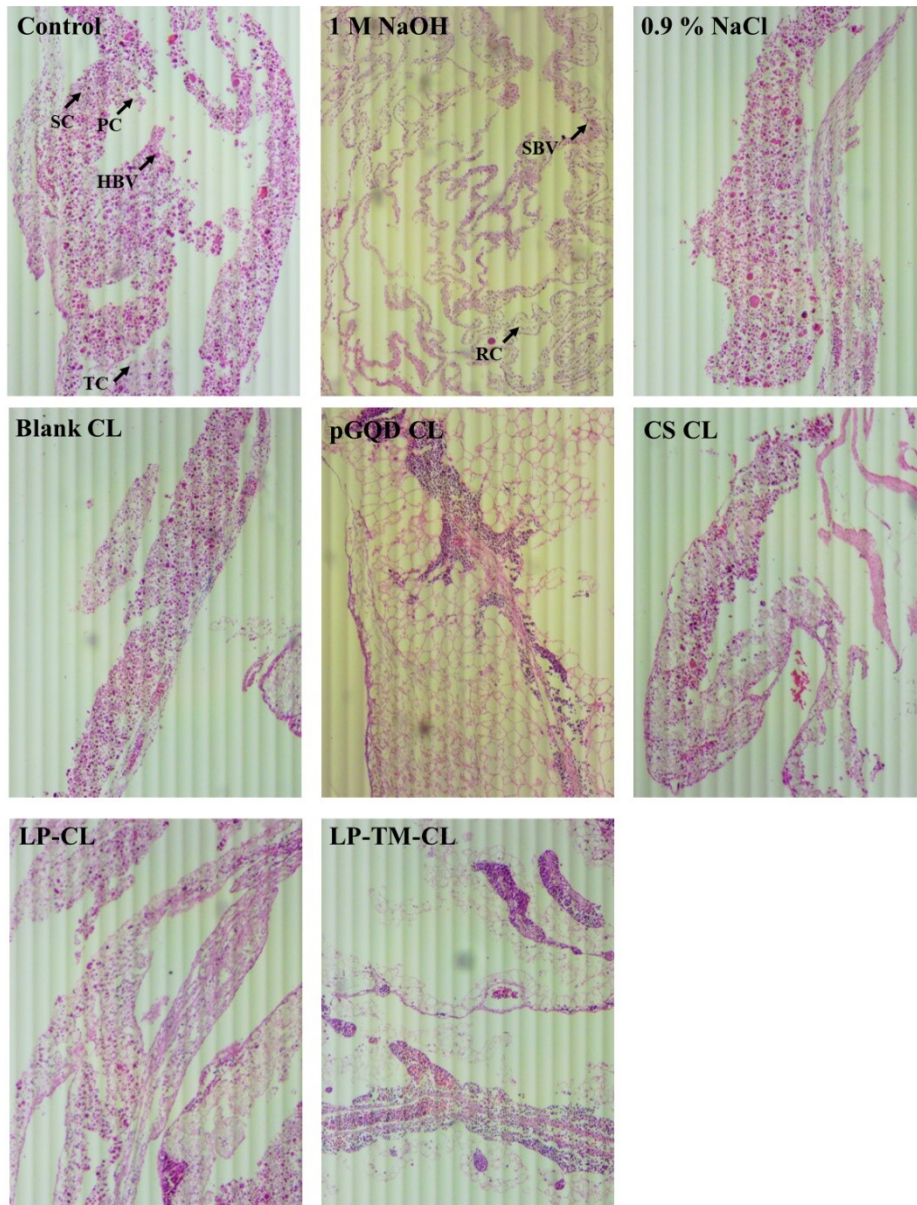

79

80 **Fig.S8. Histopathological sections of chorioallantoic membranes (CAMs) treated with**  
 81 **fabricated contact lenses (Control, 1M NaOH, 0.9 % NaCl, Blank CL, pGQD CL, CS CL,**  
 82 **LP-CL, LP-TM-CL) by H & E staining with 20 X magnification (HBV-Healthy blood**  
 83 **vessels; PC-Primary capillaries; SC-Secondary capillaries; TC-Tertiary capillaries;**  
 84 **SBV-Shrunken blood vessels; RC-Reduced capillaries).**

85

86

87

88 **Table. S2. Scoring table of *in vivo* ocular safety evaluation of LP-CL, and LP-TM-CL.**

| Corneal regions              | Degree of irritation |          |
|------------------------------|----------------------|----------|
|                              | LP-CL                | LP-TM-CL |
| <b>Cornea</b>                |                      |          |
| Corneal opacity              | 1                    | 1        |
| <b>Iris</b>                  |                      |          |
| Irritation value             | 0                    | 0        |
| <b>Conjunctiva</b>           |                      |          |
| Degree of flare              | 0                    | 0        |
| Degree of swelling           | 0                    | 0        |
| Degree of redness            | 0                    | 0        |
| <b>Congestion</b>            | 0                    | 0        |
| <b>Secretion (discharge)</b> | 0                    | 0        |

89
